# Supplementary material for: DPEP1 is a direct target of miR-193a-5p and promotes hepatoblastoma progression by PI3K/Akt/mTOR pathway
Source: PubMed Central journal article supplement (PMC6754441; doi:10.1038/s41419-019-1943-0), 2019-09-20

## Cell Line Authentication – STR Profiling

Sample Type: Cell Line

Sample from: The First Affiliated Hospital of Zhengzhou University,  
Zhengzhou 450052, China

Testing Method: STR Genotyping

Report Time: August 10, 2019

## Sample code

Table 1. Sample Code

| Customer's code | Company Code   |
|-----------------|----------------|
| 01              | 20190810-03-01 |

Sample Number: 1

Sample Type: Cell line

Testing Type: STR

Sample From: The First Affiliated Hospital of Zhengzhou University

### Testing Method:

DNA was extracted by a commercial kit from CORNING (AP-EMN-BL-GDNA-250G). The twenty STRs including Amelogenin locus were amplified by six multiplex PCR and separated on ABI 3730XL Genetic Analyzer. The signals were then analyzed by the software GeneMapper.

### Data Interpretation:

Cell lines were authenticated using Short Tandem Repeat (STR) analysis as described in 2012 in

ANSI Standard (ASN-0002) by the ATCC Standards Development Organization (SDO) and in

Capes-Davis et al., Match criteria for human cell line authentication: Where do we draw the line?

Int J Cancer.2013;132(11):2510-9.

### Test Results:

#### 1. Result

Table 2. Matching information on the cell lines

| Sample Code    | Multi-allele | Cell line matched | Cell Bank | Percentage |
|----------------|--------------|-------------------|-----------|------------|
| 20190810-03-01 | NO           | HEPG2             | ATCC      | 9/9        |

- **Multi-allele means some STR contain more than two loci.**

## 2. Sample Description

20190810-03 The DNA of the cell lines found to basic match the type of cell lines in a cell lineretrieval, ATCC database shows that cells called HEPG2 corresponding to the cell number CRL-11997 . No multiple alleles were found in this cell line.

## 3. Genotyping Result

| STR and Amelogenin Genotyping Results of Cell line 20171012-01 |            |         |         |                               |         |         |
|----------------------------------------------------------------|------------|---------|---------|-------------------------------|---------|---------|
| Loci                                                           | Sample : 8 |         |         | Cell Bank information : HEPG2 |         |         |
|                                                                | Allele1    | Allele2 | Allele3 | Allele1                       | Allele2 | Allele3 |
| D5S818                                                         | 11         | 12      | 13      | 11                            | 12      |         |
| D13S317                                                        | 9          | 13      |         | 9                             | 13      |         |
| D7S820                                                         | 10         | 10      |         | 10                            | 10      |         |
| D16S539                                                        | 12         | 13      |         | 12                            | 13      |         |
| VWA                                                            | 17         | 17      |         | 17                            | 17      |         |

|         |      |      |    |    |    |  |
|---------|------|------|----|----|----|--|
| TH01    | 9    | 9    |    | 9  | 9  |  |
| AMEL    | X    | Y    |    | X  | Y  |  |
| TPOX    | 8    | 9    |    | 8  | 9  |  |
| CSF1PO  | 10   | 11   |    | 10 | 11 |  |
| D12S391 | 21   | 25   |    |    |    |  |
| FGA     | 22   | 25   |    |    |    |  |
| D2S1338 | 19   | 20   |    |    |    |  |
| D21S11  | 29   | 30   | 31 |    |    |  |
| D18S51  | 13   | 14   |    |    |    |  |
| D8S1179 | 15   | 16   |    |    |    |  |
| D3S1358 | 15   | 16   |    |    |    |  |
| D6S1043 | 13   | 13   |    |    |    |  |
| PENTAE  | 15   | 20   |    |    |    |  |
| D19S433 | 15.2 | 15.2 |    |    |    |  |
| PENTAD  | 9    | 13   |    |    |    |  |

## Others

### 1. Genotyping Strategy and Site Distribution

Attached Table. Experimental Strategy and Sites

|          | <b>Strategy 1</b> | <b>Strategy 2</b> | <b>Strategy 3</b> | <b>Strategy 4</b> |
|----------|-------------------|-------------------|-------------------|-------------------|
| <b>1</b> | TH01              | TPOX              | D3S1358           | AMEL              |

|   |         |         |         |         |
|---|---------|---------|---------|---------|
| 2 | D12S391 | VWA     | D13S317 | D5S818  |
| 3 | D7S820  | D8S1179 | D6S1043 | D2S1338 |
| 4 | CSF1PO  | PENTAD  | D16S539 | D21S11  |
| 5 | FGA     |         | D19S433 | D18S51  |
| 6 | PENTAE  |         |         |         |

---

*The allele match algorithm compares the 8 core loci plus amelogenin only, even though alleles from all loci will be reported when available.*

2. DSMZ tools was used to carry on the cell line comparison, which contains 2455 cell lines STR data from ATCC, DSMZ, JCRB ,ECACC and RIKEN databases. If the cell is not included in the above cell library, users need to compared with other databases.
-

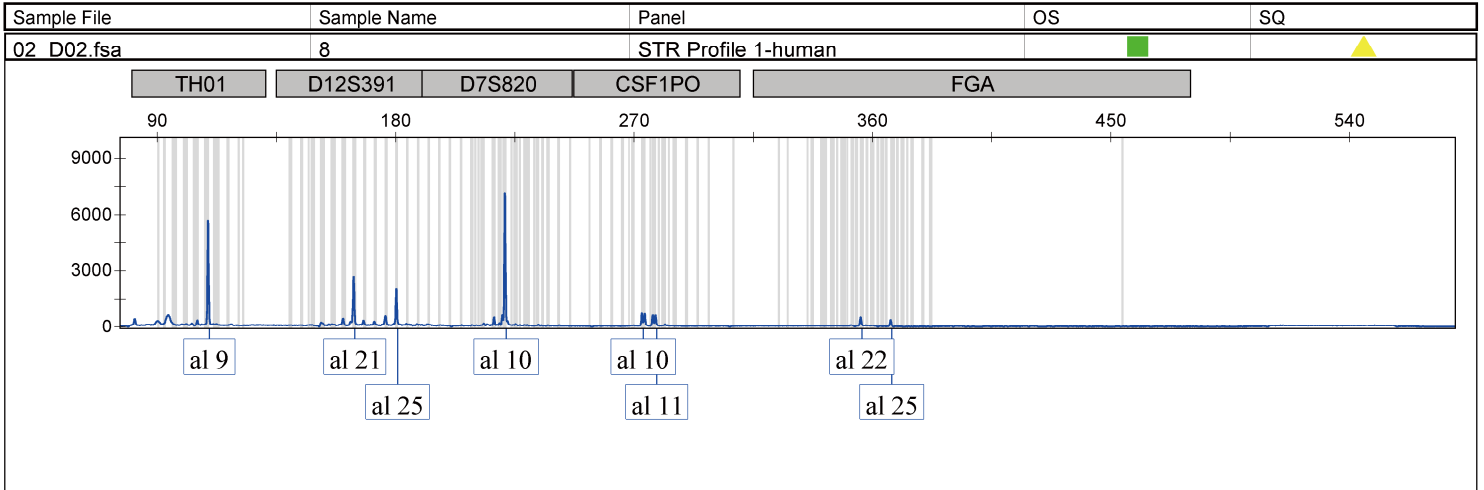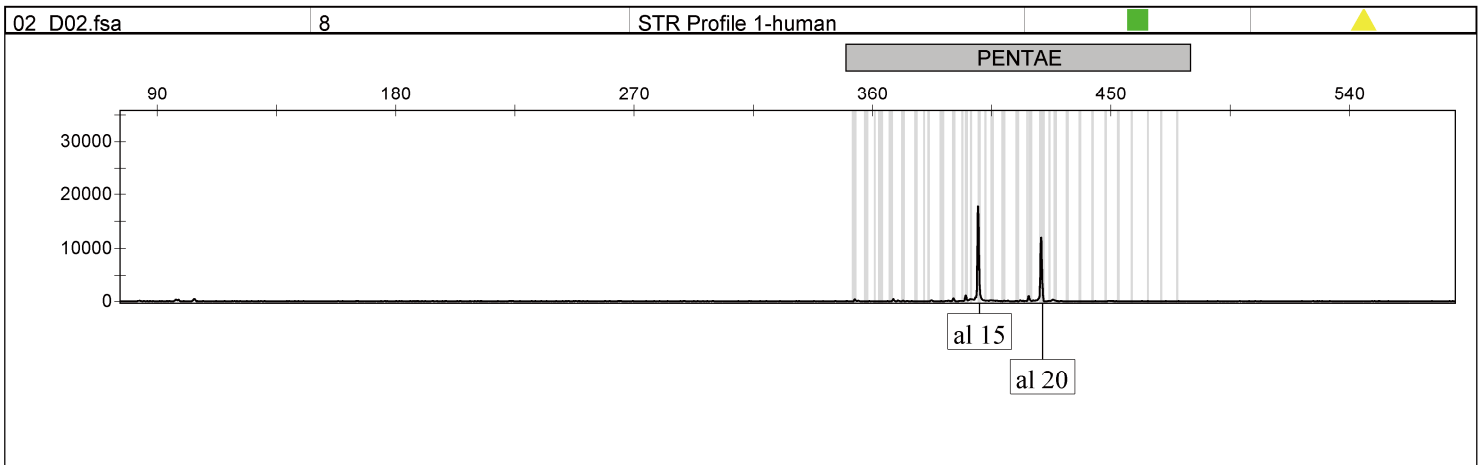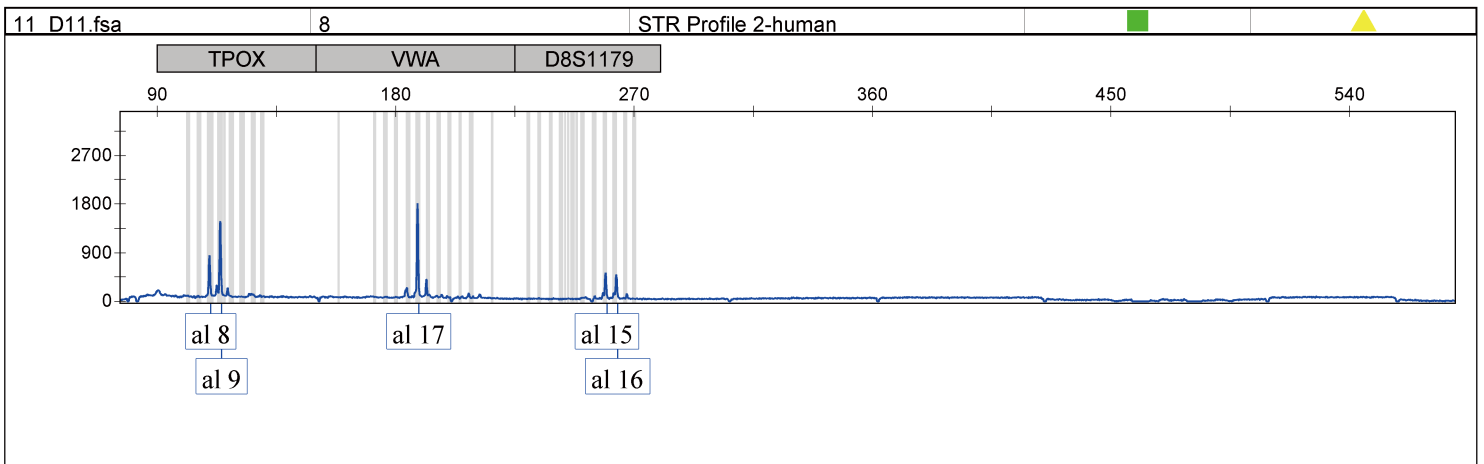

| Sample File | Sample Name | Panel               | OS                                   | SQ                                    |
|-------------|-------------|---------------------|--------------------------------------|---------------------------------------|
| 11 D11.fsa  | 8           | STR Profile 2-human | <span style="color: green;">■</span> | <span style="color: yellow;">▲</span> |

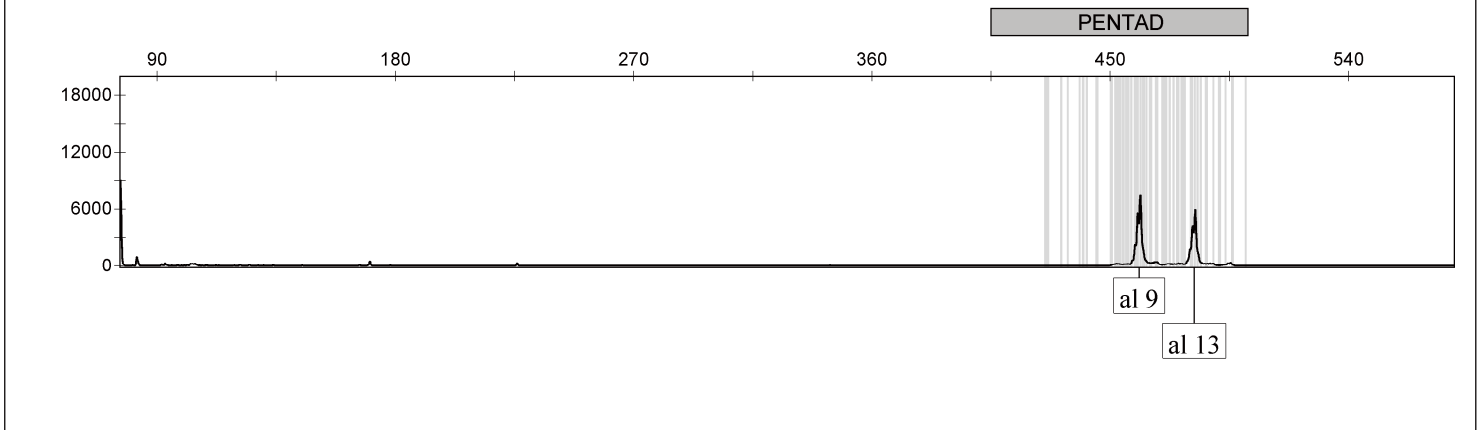

| Sample File | Sample Name | Panel               | OS                                   | SQ                                    |
|-------------|-------------|---------------------|--------------------------------------|---------------------------------------|
| 08 D08.fsa  | 8           | STR Profile 3-human | <span style="color: green;">■</span> | <span style="color: yellow;">▲</span> |

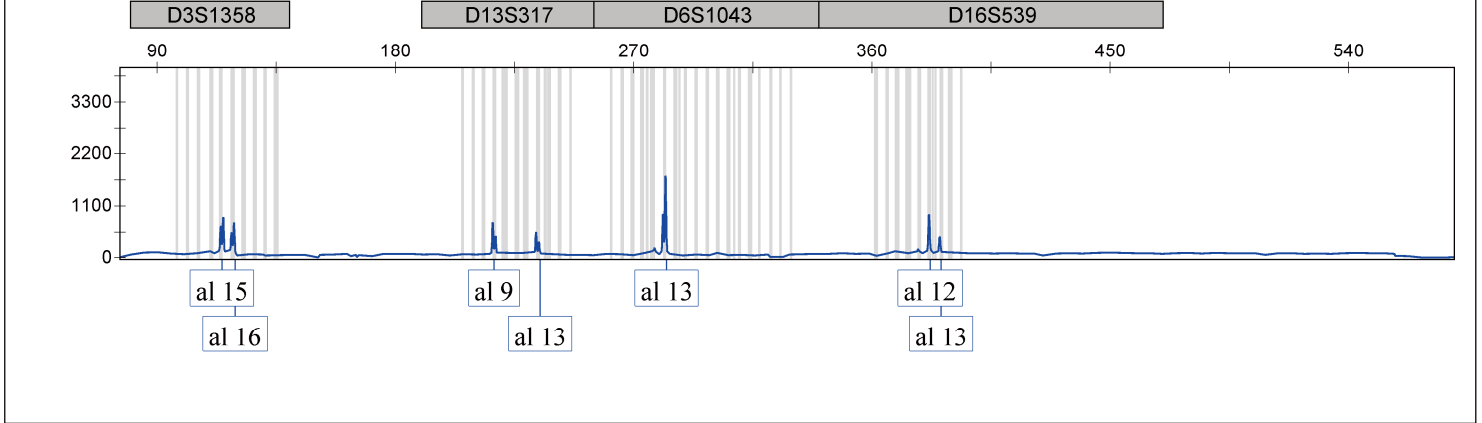

| Sample File | Sample Name | Panel               | OS                                   | SQ                                    |
|-------------|-------------|---------------------|--------------------------------------|---------------------------------------|
| 08 D08.fsa  | 8           | STR Profile 3-human | <span style="color: green;">■</span> | <span style="color: yellow;">▲</span> |

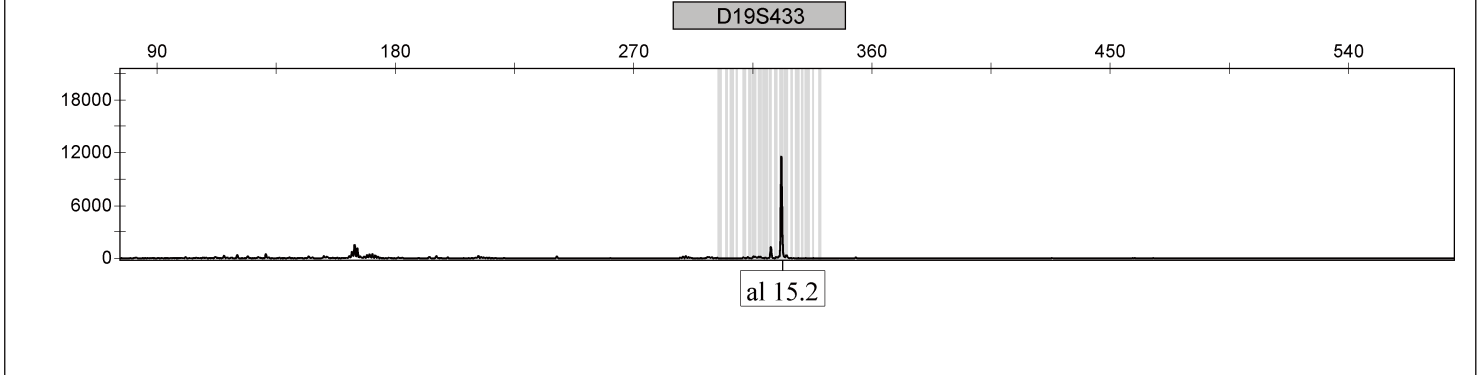

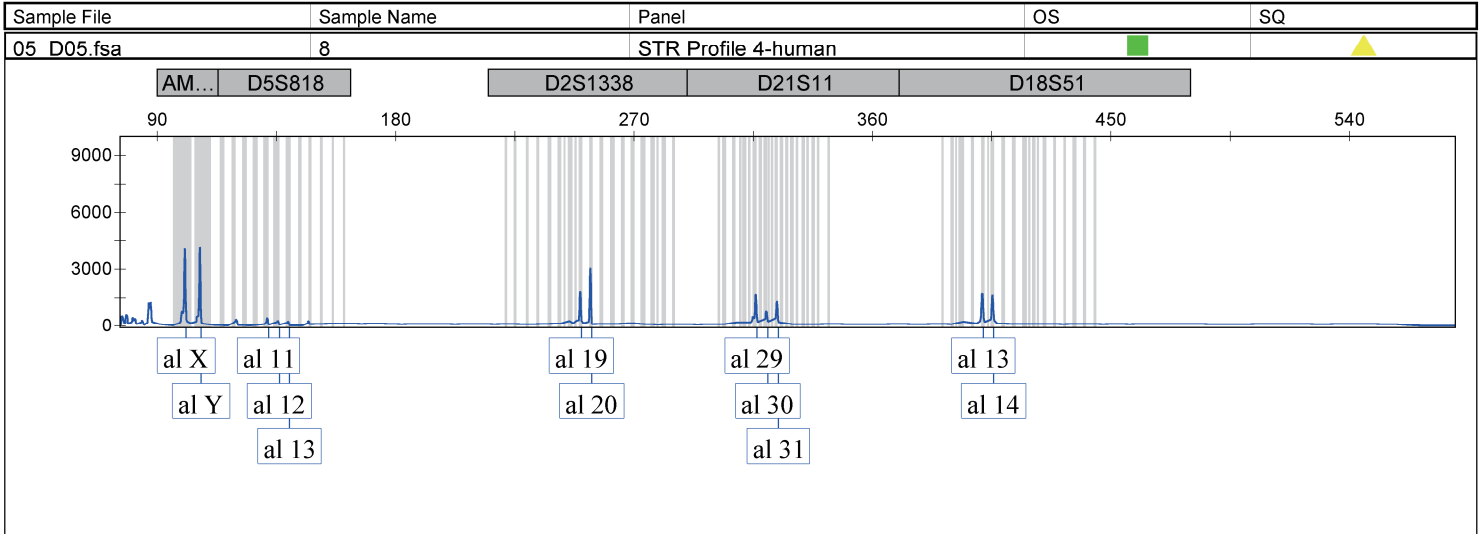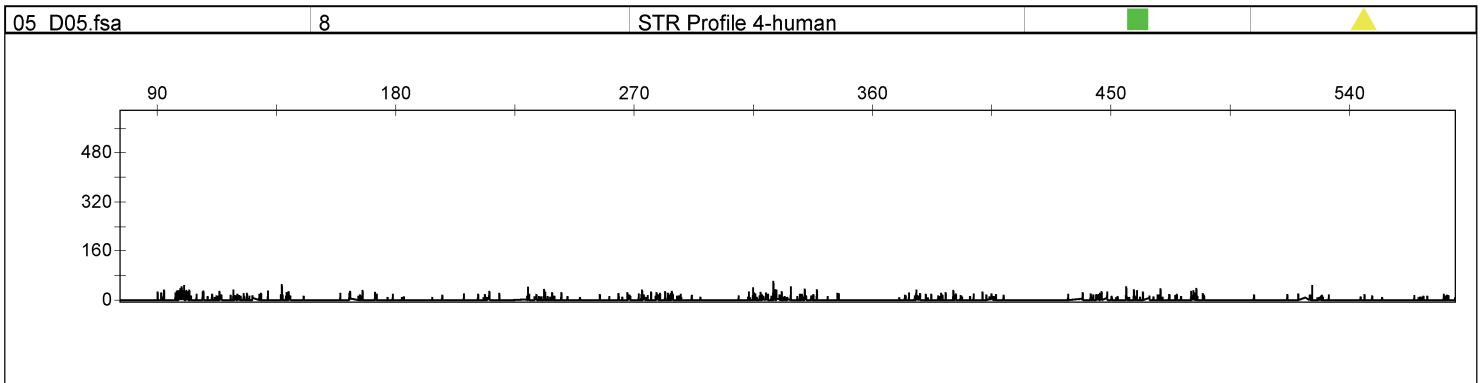

Supplement: 41419_2019_1943_MOESM8_ESM.pdf [file 41419_2019_1943_MOESM8_ESM.pdf]
