# Supplementary material for: DPEP1 is a direct target of miR-193a-5p and promotes hepatoblastoma progression by PI3K/Akt/mTOR pathway
Source: PubMed Central journal article supplement (PMC6754441; doi:10.1038/s41419-019-1943-0), 2019-09-20

## Cell Line Authentication – STR Profiling

Sample Type: Cell Line

Sample from: The First Affiliated Hospital of Zhengzhou University,  
Zhengzhou 450052, China

Testing Method: STR Genotyping

Report Time: August 10, 2019

---

## Cell Line Authentication – STR Profiling Report

---

Sample code

Table 1. Sample Code

| Customer's code | Company Code |
|-----------------|--------------|
| 2               | 20190810-03  |

Sample Number: 1

Sample Type: Cell line

Testing Type: STR

Sample From: The First Affiliated Hospital of Zhengzhou University

Testing Method:

DNA was extracted by a commercial kit from CORNING (AP-EMN-BL-GDNA-250G). The twenty STRs including Amelogenin locus were amplified by six multiplex PCR and separated on ABI 3730XL Genetic Analyzer. The signals were then analyzed by the software GeneMapper.

Data Interpretation:

Cell lines were authenticated using Short Tandem Repeat (STR) analysis as described in 2012 in ANSI Standard (ASN-0002) by the ATCC Standards Development Organization (SDO) and in Capes-Davis et al., Match criteria for human cell line authentication: Where do we draw the line? Int J Cancer.2013;132(11):2510-9.

Test Results:

### 1. Result

Table 2. Matching information on the cell lines

| Sample Code    | Multi-allele | Cell line matched | Cell Bank | Percentage |
|----------------|--------------|-------------------|-----------|------------|
| 20190810-03-02 | NO           | HELA(CHANG LIVER) | DSMZ      | 9/9        |

- **Multi-allele means some STR contain more than two loci.**

### 2. Sample Description

20190810-03-02 The DNA of the cell lines found to basic match the type of cell lines in a cell line

## STR and Amelogenin Genotyping Results of Cell line 20190810-03-02

| Loci    | Sample:2 |         |         | Cell Bank information: HELA<br>(Changliver) |         |         |
|---------|----------|---------|---------|---------------------------------------------|---------|---------|
|         | Allele1  | Allele2 | Allele3 | Allele1                                     | Allele2 | Allele3 |
| D5S818  | 11       | 12      |         | 11                                          | 12      |         |
| D13S317 | 12       | 13.3    |         | 12                                          | 13.3    |         |
| D7S820  | 8        | 12      |         | 8                                           | 12      |         |
| D16S539 | 9        | 10      |         | 9                                           | 10      |         |
| VWA     | 16       | 18      |         | 16                                          | 18      |         |
| TH01    | 7        | 7       |         | 7                                           | 7       |         |
| AMEL    | X        | X       |         | X                                           | X       |         |
| TPOX    | 8        | 12      |         | 8                                           | 12      |         |
| CSF1PO  | 9        | 10      |         | 9                                           | 10      |         |
| D12S391 | 20       | 25      |         |                                             |         |         |
| FGA     | 21       | 21      |         |                                             |         |         |
| D2S1338 | 17       | 17      |         |                                             |         |         |
| D21S11  | 27       | 28      |         |                                             |         |         |
| D18S51  | 16       | 16      |         |                                             |         |         |
| D8S1179 | 12       | 13      |         |                                             |         |         |
| D3S1358 | 15       | 18      |         |                                             |         |         |
| D6S1043 | 18       | 19      |         |                                             |         |         |
| PENTAE  | 7        | 17      |         |                                             |         |         |
| D19S433 | 13       | 14      |         |                                             |         |         |
| PENTAD  | 8        | 15      |         |                                             |         |         |

Others:

1. Genotyping Strategy and Site Distribution

Attached Table. Experimental Strategy and Sites

|   | <b>Strategy 1</b> | <b>Strategy 2</b> | <b>Strategy 3</b> | <b>Strategy 4</b> |
|---|-------------------|-------------------|-------------------|-------------------|
| 1 | TH01              | TPOX              | D3S1358           | AMEL              |
| 2 | D12S391           | VWA               | D13S317           | D5S818            |
| 3 | D7S820            | D8S1179           | D6S1043           | D2S1338           |
| 4 | CSF1PO            | PENTAD            | D16S539           | D21S11            |
| 5 | FGA               |                   | D19S433           | D18S51            |
| 6 | PENTAE            |                   |                   |                   |

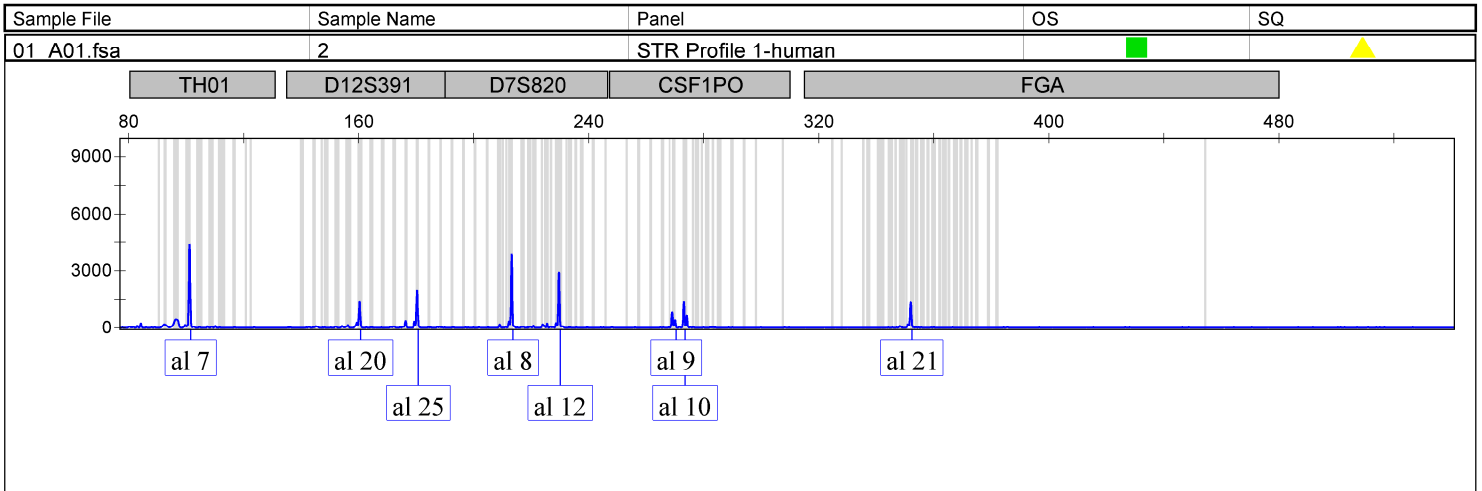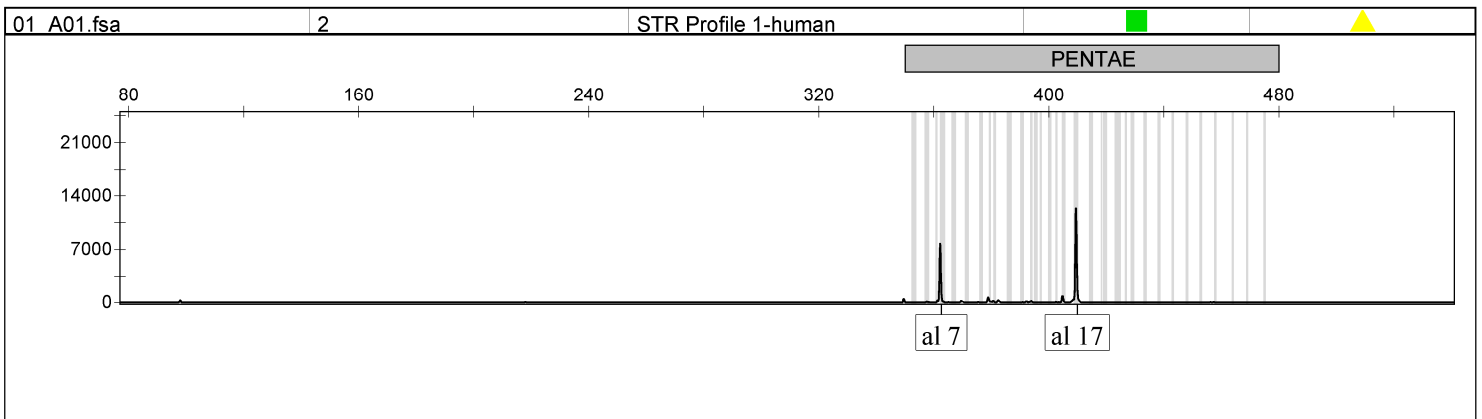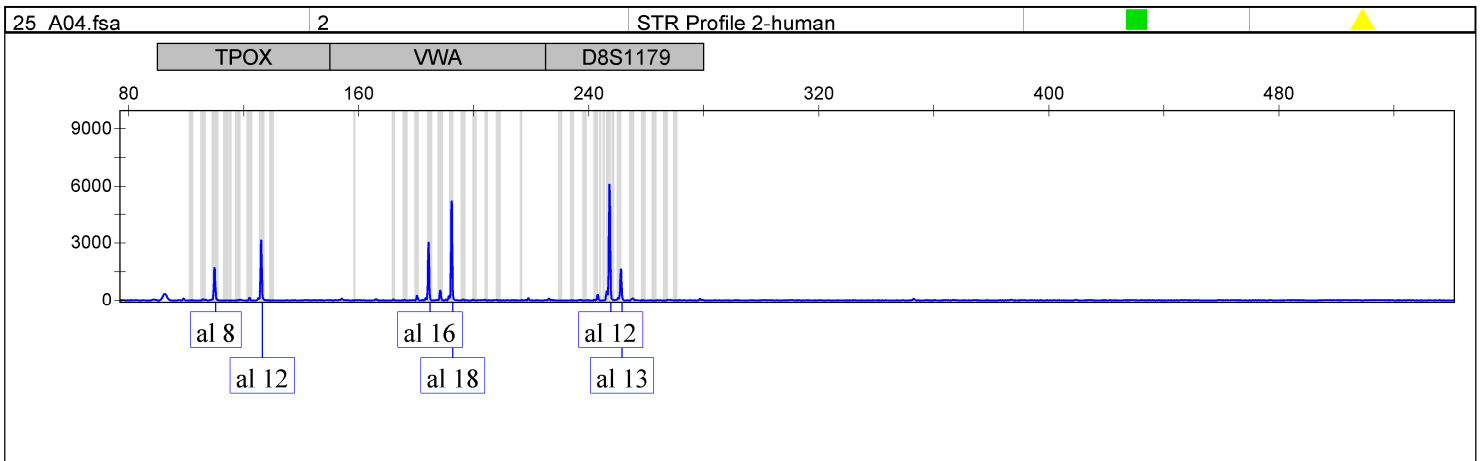

| Sample File | Sample Name | Panel               | OS                                   | SQ                                    |
|-------------|-------------|---------------------|--------------------------------------|---------------------------------------|
| 25_A04.fsa  | 2           | STR Profile 2-human | <span style="color: green;">■</span> | <span style="color: yellow;">▲</span> |

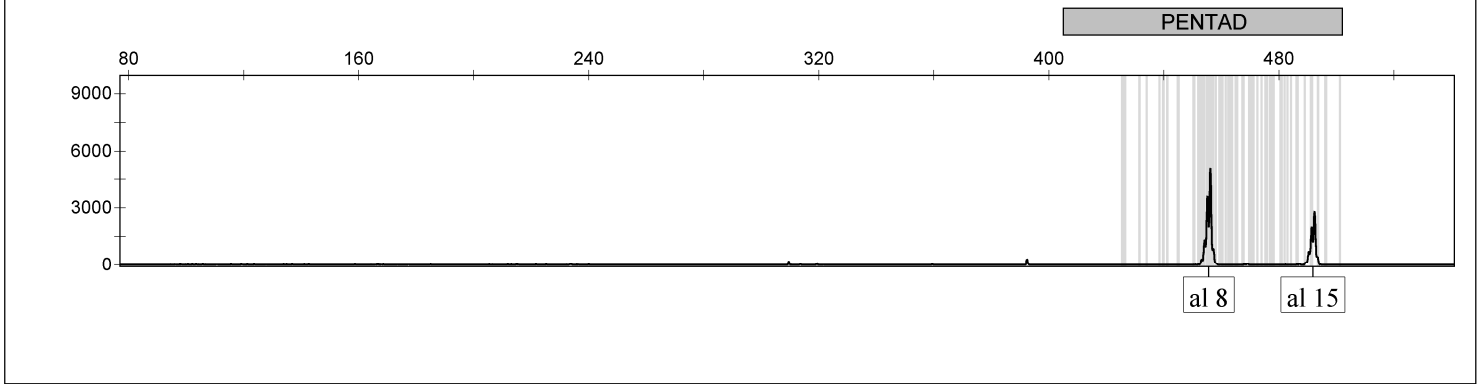

| Sample File | Sample Name | Panel               | OS                                   | SQ                                    |
|-------------|-------------|---------------------|--------------------------------------|---------------------------------------|
| 41_A06.fsa  | 2           | STR Profile 3-human | <span style="color: green;">■</span> | <span style="color: yellow;">▲</span> |

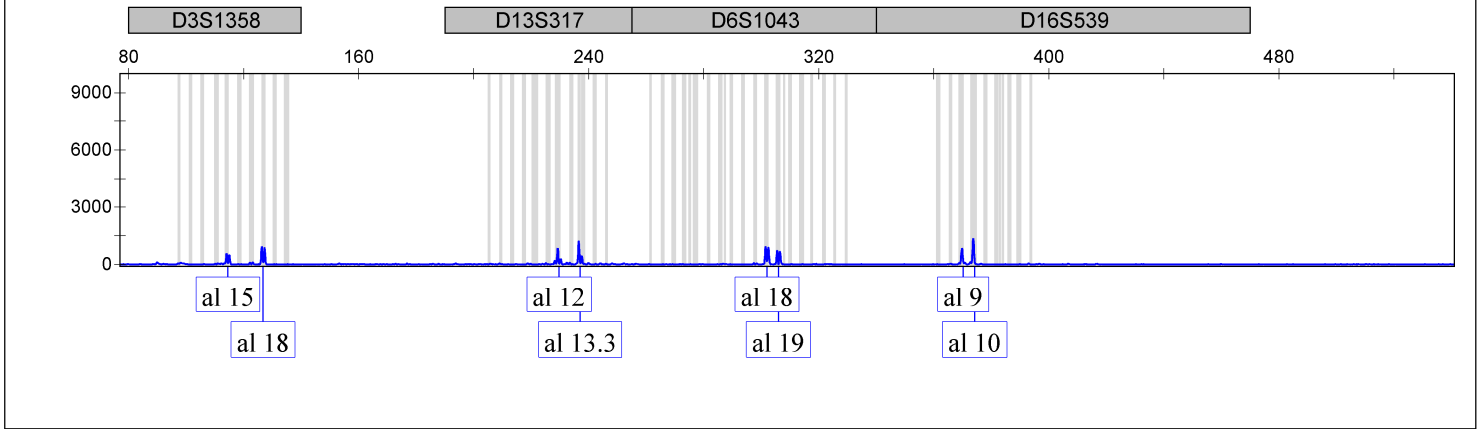

| Sample File | Sample Name | Panel               | OS                                   | SQ                                    |
|-------------|-------------|---------------------|--------------------------------------|---------------------------------------|
| 41_A06.fsa  | 2           | STR Profile 3-human | <span style="color: green;">■</span> | <span style="color: yellow;">▲</span> |

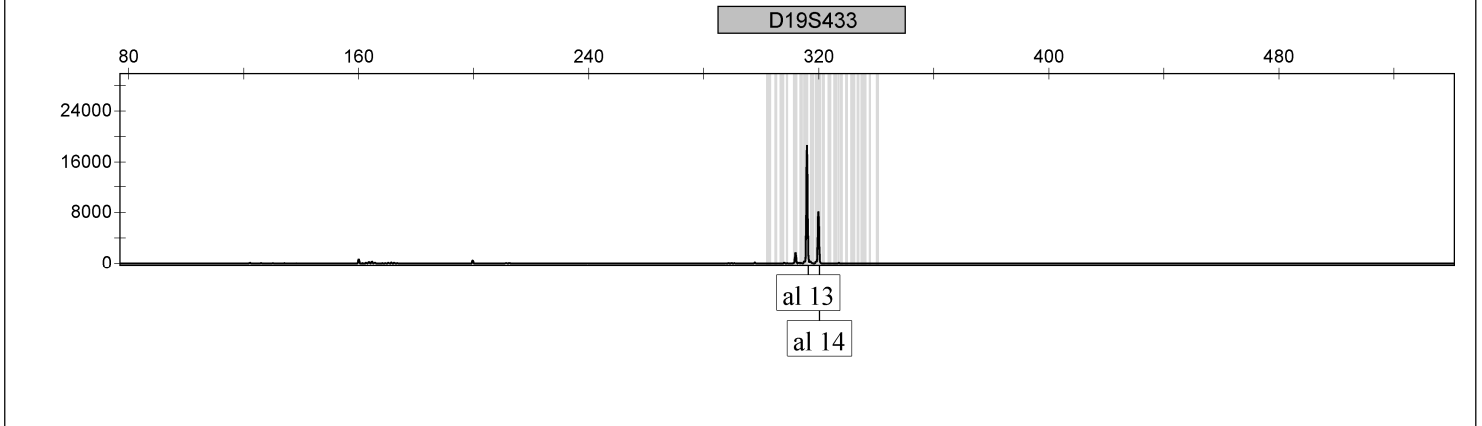

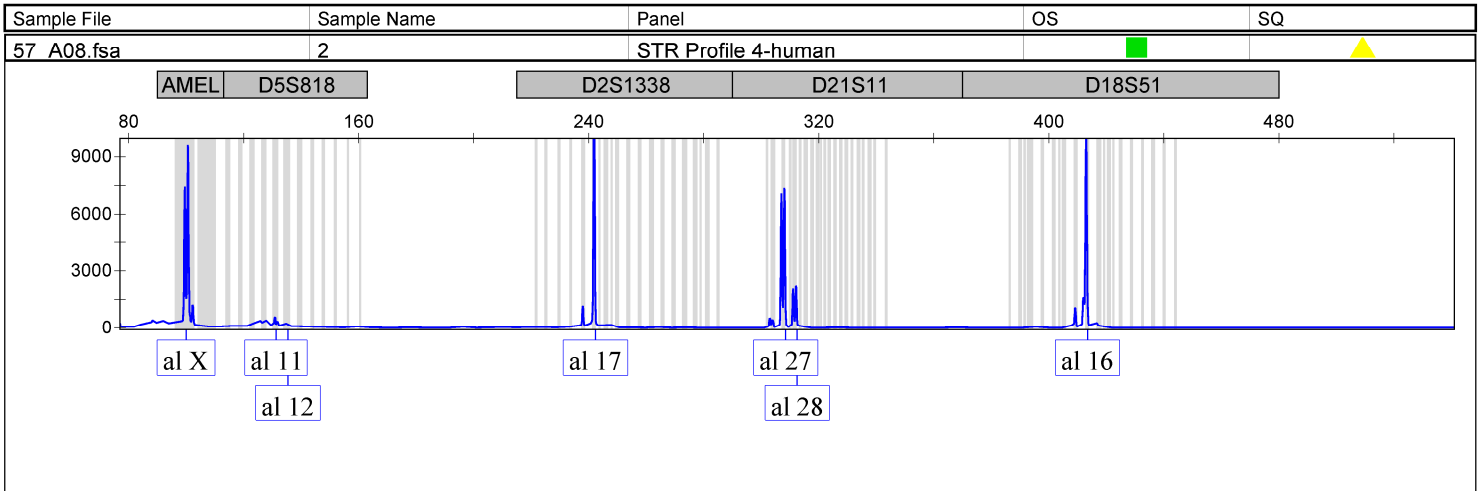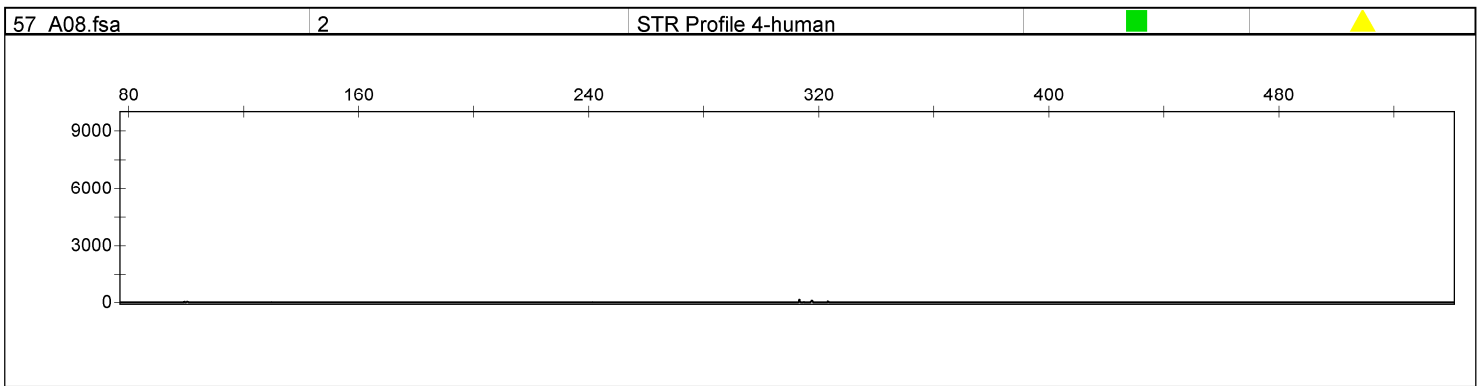

Supplement: 41419_2019_1943_MOESM9_ESM.pdf [file 41419_2019_1943_MOESM9_ESM.pdf]
