# Supplementary material for: DPEP1 is a direct target of miR-193a-5p and promotes hepatoblastoma progression by PI3K/Akt/mTOR pathway
Source: PubMed Central journal article supplement (PMC6754441; doi:10.1038/s41419-019-1943-0), 2019-09-20

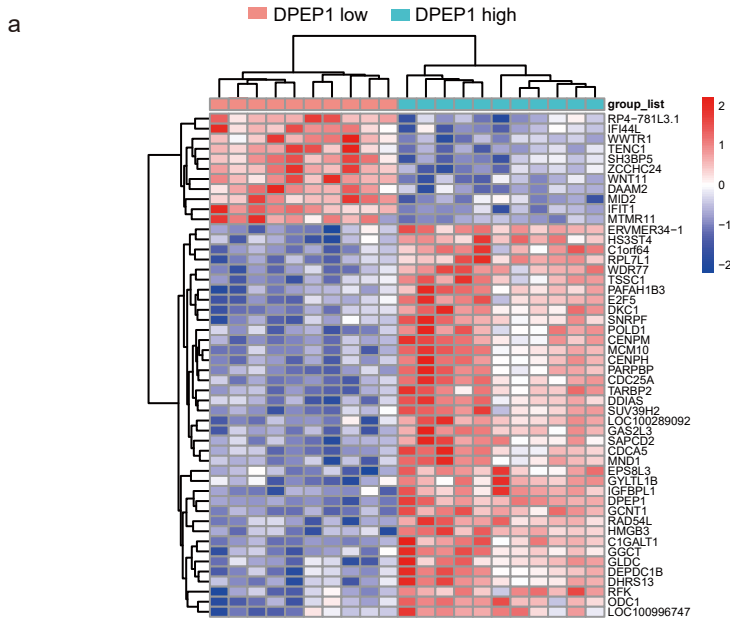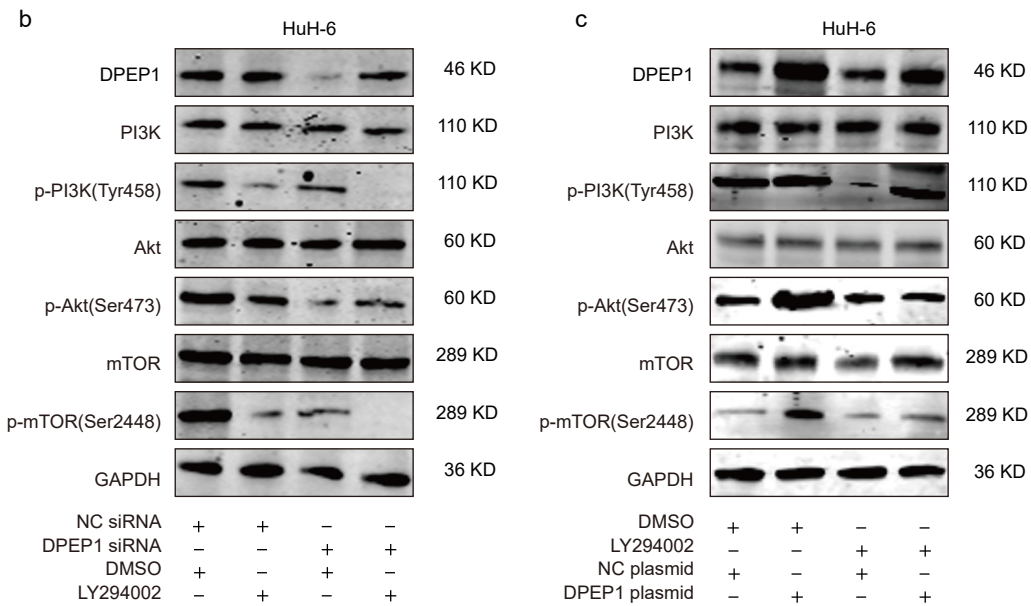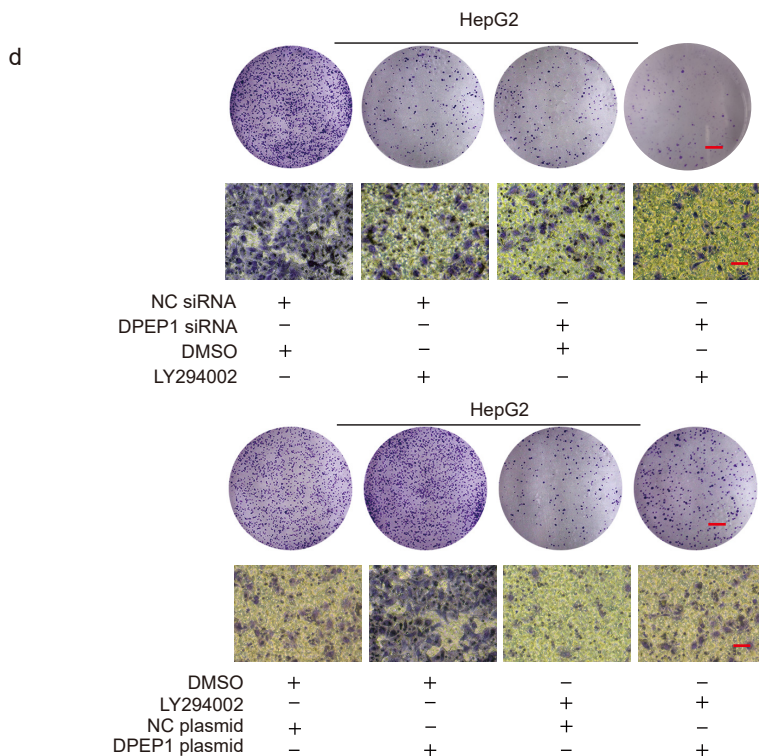

Supplement: 41419_2019_1943_MOESM5_ESM.pdf [file 41419_2019_1943_MOESM5_ESM.pdf]
